# Supplementary material for: A label-free fluorescent molecular switch for Cu2+ based on metal ion-triggered DNA-cleaving DNAzyme and DNA intercalator
Source: Royal Society of Chemistry journal article supplement (doi:10.1039/c3nj41103f), 2013-01-01
Supplement: c3nj41103f.pdf [file c3nj41103f.pdf]

## Supplementary data

# A label-free fluorescent molecular switch for $\text{Cu}^{2+}$ based on metal ion-triggered DNA-cleaving DNAzyme and DNA intercalator

Lingli Zhang, Youyu Zhang\*, Mingjie Wei, Yinhui Yi, Haitao Li, Shouzhao Yao

*Key Laboratory of Chemical Biology and Traditional Chinese Medicine Research (Ministry of Education), College of Chemistry and Chemical Engineering, Hunan Normal University, Changsha 410081, PR China. E-mail: zhangyy@hunnu.edu.cn*

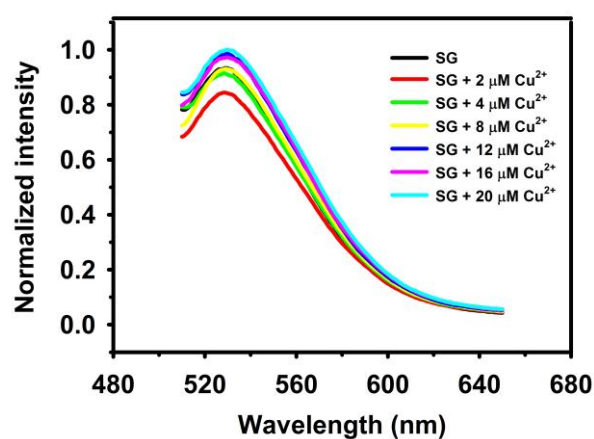

**Fig. S1.** Fluorescence emission spectra of SG in the presence of different concentrations of  $\text{Cu}^{2+}$  from 2 to 20  $\mu\text{M}$  and 0.2 mM ascorbate.  $\lambda_{\text{ex}} = 490$  nm.

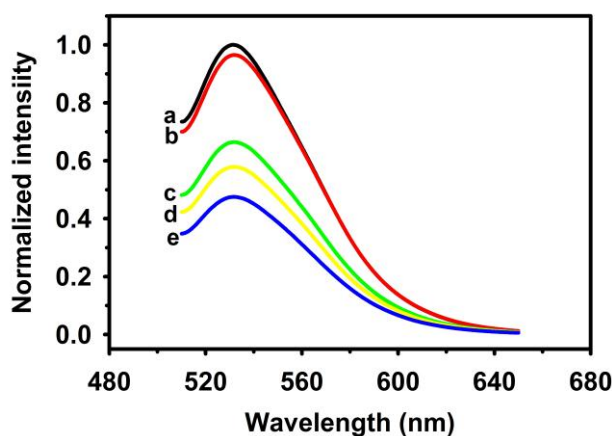

**Fig. S2.** Application of the DNAzyme sensor to the analysis of  $\text{Cu}^{2+}$  in drinking water samples: (a) blank; (b) drinking water; (c) drinking water + 0.6  $\mu\text{M}$   $\text{Cu}^{2+}$ ; (d) drinking water + 0.8  $\mu\text{M}$   $\text{Cu}^{2+}$ ; (e) drinking water + 1.0  $\mu\text{M}$   $\text{Cu}^{2+}$ .  $\lambda_{\text{ex}} = 490$  nm.
